# Supplementary material for: Secondary Organic Aerosol Formation from the Oxidation of Decamethylcyclopentasiloxane at Atmospherically Relevant OH Concentrations
Source: Copernicus journal article supplement (doi:10.5194/acp-2021-353), 2021-05-03
Supplement: Supplementary file 1 [file acp-2021-353-supplement.pdf]

# **Supporting Information: Secondary Organic Aerosol Formation from the Oxidation of Decamethylcyclopentasiloxane at Atmospherically Relevant OH Concentrations**

Sophia M. Charan<sup>1</sup>, Yuanlong Huang<sup>1</sup>, Reina S. Buenconsejo<sup>1</sup>, Qi Li<sup>2</sup>, David R. Cocker III<sup>2</sup>, and John H. Seinfeld<sup>1</sup>

<sup>1</sup>California Institute of Technology, Pasadena, California 91125, United States

<sup>2</sup>University of California – Riverside, Riverside, California 92521, United States

**Correspondence:** seinfeld@caltech.edu

Two Figures (S1–S2), 2 pages total

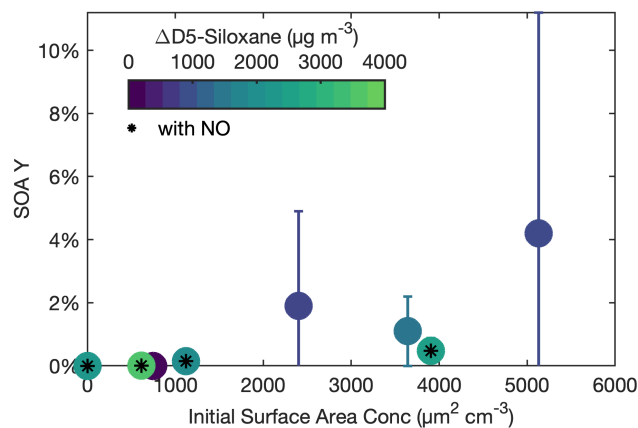

**Figure S1.** SOA yield at the end of each experiment with the associated uncertainty is shown as a function of the initial seed surface area concentration. The color of each point represents the amount of D5 that reacted throughout the entire experiment. Experiments with  $\text{NO}_x$  present include a black asterisk in their center.

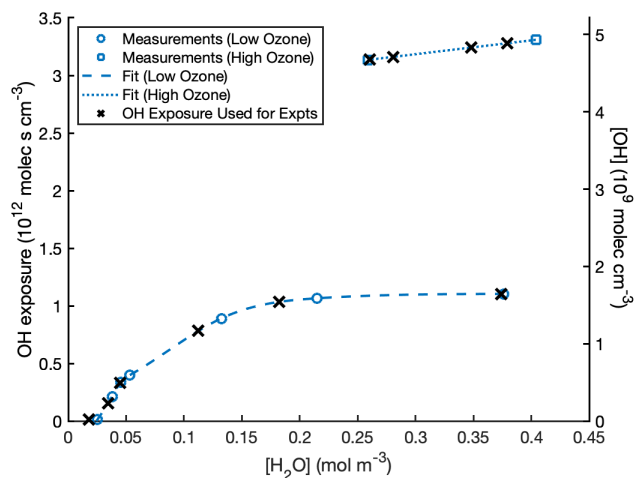

**Figure S2.** Determination of the OH exposure and, correspondingly, of the OH concentration of Experiments 9–19. Blue circles and squares are the measurements of the OH exposure using the reaction of  $\text{SO}_2$  for the low and high  $\text{O}_3$  cases, respectively. The dashed and dotted lines are the fits to these measurements and the black Xs are the corresponding OH exposure values used for Experiments 9–19.
